# Supplementary material for: Bacteraemia Caused by Probiotic Strains of Lacticaseibacillus rhamnosus—Case Studies Highlighting the Need for Careful Thought before Using Microbes for Health Benefits
Source: MDPI journal article supplement (doi:10.3390/pathogens11090977), 2022-08-26
Supplement: s1 [file s1]

# Bacteraemia caused by probiotic strains of *Lactocaseibacillus rhamnosus* – case studies highlighting the need for careful thought before using microbes for health benefits

Agnieszka Mikucka<sup>1</sup>, Aleksander Deptuła<sup>2</sup>, Tomasz Bogiel<sup>1\*</sup>, Agnieszka Chmielarczyk<sup>3</sup>, Elżbieta Nurczyńska<sup>4</sup>, Eugenia Gospodarek-Komkowska<sup>1</sup>

<sup>1</sup> Department of Microbiology Ludwik Rydygier Collegium Medicum in Bydgoszcz, Nicolaus Copernicus University in Torun, Poland

<sup>2</sup> Department of Propaedeutics of Medicine and Infection Prevention Ludwik Rydygier Collegium Medicum in Bydgoszcz, Nicolaus Copernicus University in Torun, Poland

<sup>3</sup> Chair of Microbiology, Jagiellonian University Medical College in Cracow, Poland

<sup>4</sup> Anesthesiology and Intensive Care Unit, University Hospital No 1 in Bydgoszcz, Poland

\* **Correspondence:** 9 Maria Skłodowska-Curie Street, 85-094 Bydgoszcz, e-mail: t.bogiel@cm.umk.pl (T.B.), telephone number: +48 52 585 44 80

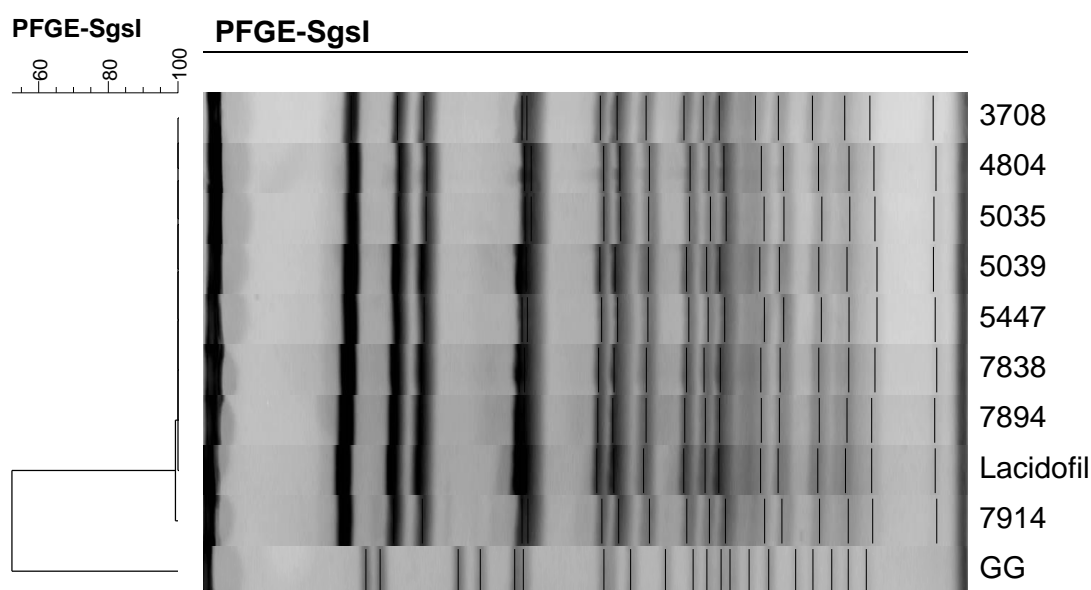

**Figure S1.** PFGE typing profiles of *L. rhamnosus* obtained with SgsI restriction enzyme digestion. Analysis was done in Gel Compar software (coefficient Dice, UPGMA algorithm, UPGMA, Tol. 1%, Opt 0.5%, Min area 0.0%), 3708-7914 – the strains isolated from the patients, Lacidofil – probiotic strain *L. rhamnosus* derived from Lacidofil (LALLEMAND SAS); GG – *L. rhamnosus* strain GG isolated from Dicoflor (Bayer)
